# Supplementary material for: Is It Possible to Maintain Consciousness and Spontaneous Ventilation with Chest Compression in the Early Phase of Cardiac Arrest?
Source: Hindawi journal article supplement (doi:10.1155/2016/3158015), 2016-01-01

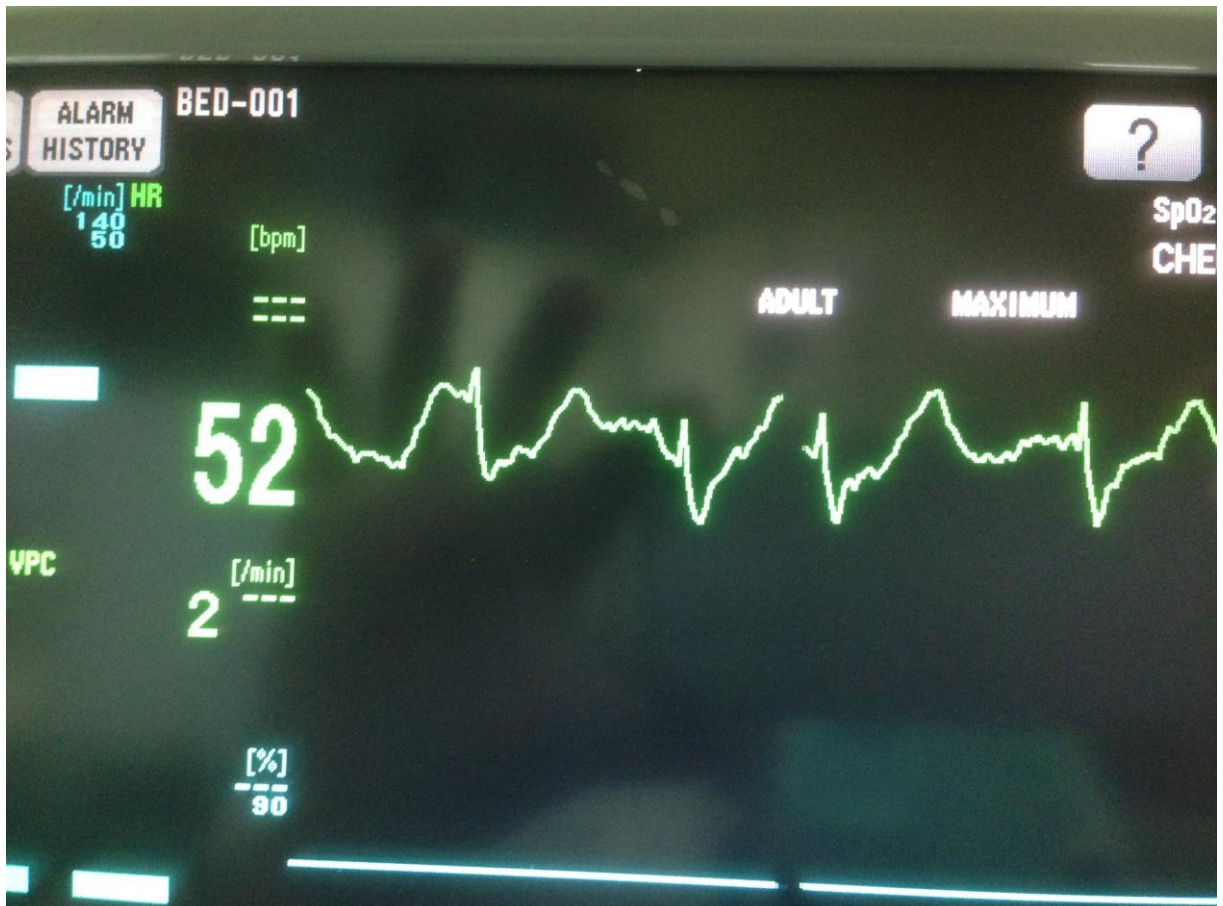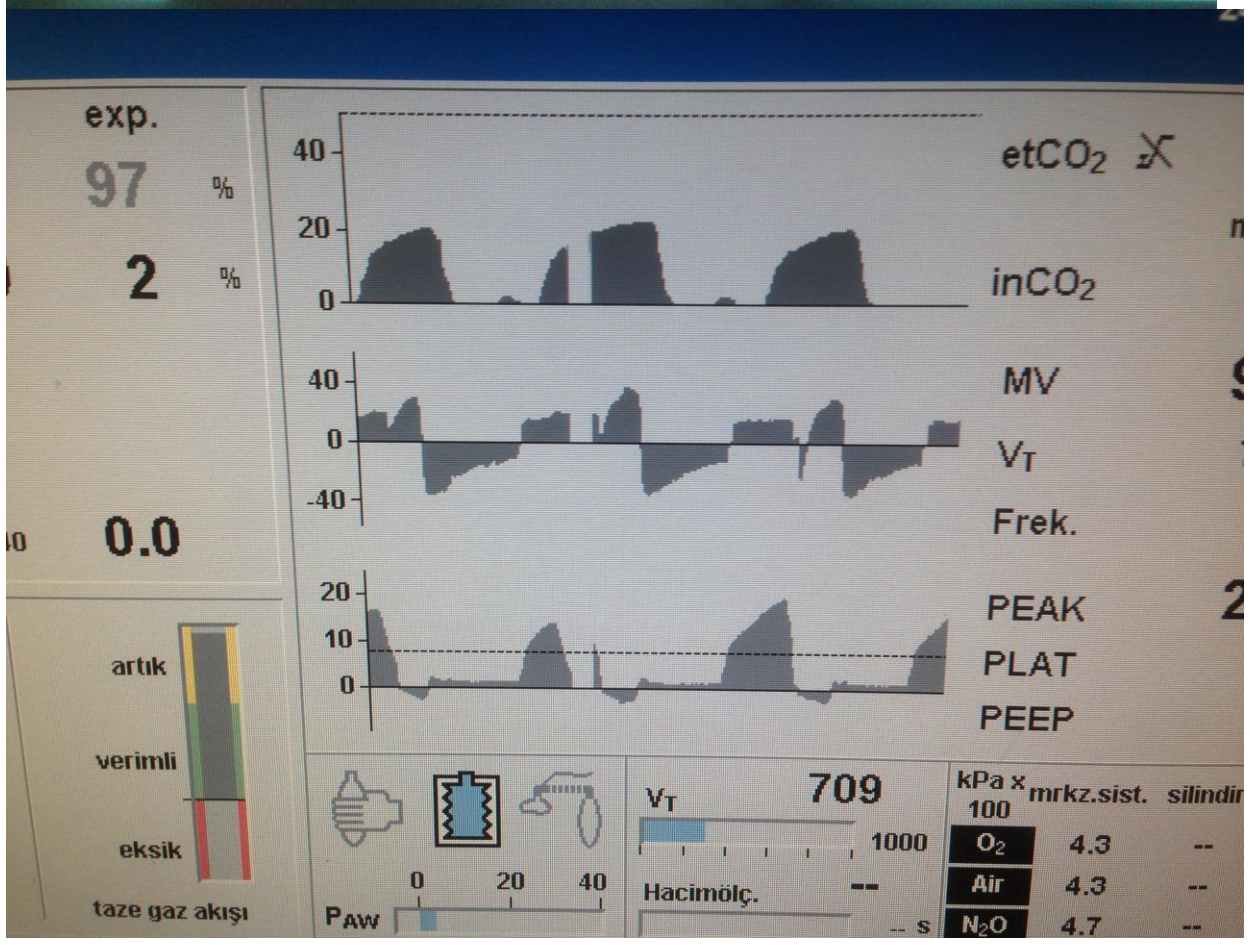

Supplement: f1 [file 3158015.f1.pdf]
